# Supplementary material for: Long-Term Survival and Immune Response Dynamics in Melanoma Patients Undergoing TAPCells-Based Vaccination Therapy
Source: MDPI journal article supplement (doi:10.3390/vaccines12040357), 2024-03-27
Supplement: s1 [file s1]

## Supplementary material

**Supplementary Table S1.** TAPCells-vaccinated melanoma patients in the clinical trials.

| Code (#)                                              | Sex | Age (*) | Stage | Met | Primary tumor                        | Additional treatment | Adjuvant                   | irAEs                       | DTH | Status | OS (months) |
|-------------------------------------------------------|-----|---------|-------|-----|--------------------------------------|----------------------|----------------------------|-----------------------------|-----|--------|-------------|
| <b>Short-term survivors (&lt; 36 months) (n = 53)</b> |     |         |       |     |                                      |                      |                            |                             |     |        |             |
| MT1 <sup>D</sup>                                      | F   | 41      | IV    | M1b | Trunk (right upper hemithorax)       | Surgery              | KLH + Al(OH) <sub>3</sub>  | No                          | +   | D      | 28          |
| MT2 <sup>D</sup>                                      | M   | 60      | IV    | M1b | Limb (left thigh)                    | Surgery              | Al(OH) <sub>3</sub>        | Fever                       | -   | D      | 16          |
| MT3                                                   | M   | 35      | IV    | M1c | Limb (Left shoulder /armpit)         | Surgery              | Al(OH) <sub>3</sub> + IL-2 | No                          | +   | D      | 15          |
| MT4 <sup>D</sup>                                      | M   | 39      | IV    | M1c | Head and neck (Left cheekbone)       | Surgery              | KLH                        | No                          | +   | D      | 5           |
| MT6                                                   | F   | 35      | IV    | M1b | Limb (Left knee)                     | Surgery + local RT   | KLH                        | No                          | -   | D      | 1           |
| MT7                                                   | F   | 68      | IV    | M1c | Trunk (back)                         | Surgery              | KLH                        | No                          | -   | D      | 6           |
| MT8                                                   | F   | 53      | IV    | M1a | Limb (left foot sole)                | Surgery              | KLH + IL-2                 | Low fever                   | -   | D      | 11          |
| MT11                                                  | M   | 64      | IV    | M1c | Head and neck (retro-orbital)        | Surgery + RT         | KLH                        | No                          | NT  | D      | 1           |
| MT12                                                  | M   | 65      | IV    | M1c | Limb (right foot sole)               | Surgery              | Al(OH) <sub>3</sub> + IL-2 | No                          | -   | D      | 3           |
| MT14                                                  | M   | 45      | IIIC  | N3  | Limb (left shoulder)                 | Surgery              | KLH + IL-2                 | No                          | +   | D      | 10          |
| MT16                                                  | F   | 21      | IIIC  | N2c | Limb (dorsal left thigh, upper half) | Surgery              | KLH                        | Headache, flu-like symptoms | +   | D      | 14          |
| MT17                                                  | M   | 51      | IV    | M1c | Head and neck (left zygomatic bone)  | Surgery              | KLH + IL-2                 | Slight nausea, low appetite | NT  | D      | 10          |
| MT19 <sup>D</sup>                                     | M   | 19      | IV    | M1c | Head and neck (right eye)            | Surgery + local RT   | KLH                        | Slight migraine             | -   | D      | 5           |
| MT22                                                  | M   | 50      | IV    | M1c | Limb (right foot big toe)            | Surgery              | Al(OH) <sub>3</sub> + IL-2 | No                          | NT  | D      | 2           |
| MT23 <sup>G</sup>                                     | M   | 40      | IV    | M1a | Head and neck (right                 | Surgery + RT         | Al(OH) <sub>3</sub> + IL-2 | No                          | -   | D      | 11          |

|                   |   |    |      |     |                                                      |                                   |                               |                   |    |   |    |
|-------------------|---|----|------|-----|------------------------------------------------------|-----------------------------------|-------------------------------|-------------------|----|---|----|
|                   |   |    |      |     | malar)                                               |                                   |                               |                   |    |   |    |
| MT24 <sup>D</sup> | M | 77 | IV   | N3  | Limb (left<br>suprascapular)                         | Surgery                           | Al(OH) <sub>3</sub> +<br>IL-2 | No                | -  | D | 5  |
| MT25 <sup>D</sup> | M | 51 | IV   | M1c | Trunk (right<br>scapular,<br>nodular<br>venous)      | Surgery +<br>RT                   | KLH                           | No                | NT | D | 4  |
| MT28              | F | 70 | IV   | M1b | Trunk (vulva)                                        | Surgery                           | Al(OH) <sub>3</sub>           | No                | +  | D | 7  |
| MT29 <sup>D</sup> | M | 42 | IV   | M1b | Trunk<br>(periumbilical<br>abdomen)                  | Surgery                           | Al(OH) <sub>3</sub>           | No                | +  | D | 16 |
| MT30 <sup>D</sup> | F | 81 | IV   | M1c | Limb (ventral<br>left knee)                          | Surgery +<br>local RT             | Al(OH) <sub>3</sub>           | Tiredness         | +  | D | 27 |
| MT32              | M | 59 | IIIC | N3  | Limb (ventral<br>left forearm)                       | Surgery +<br>RT                   | KLH +<br>Al(OH) <sub>3</sub>  | No                | +  | D | 10 |
| MT34 <sup>D</sup> | F | 71 | IV   | M1b | Limb<br>(subungueal<br>big toe right<br>foot)        | Surgery                           | KLH                           | No                | -  | D | 15 |
| MT36 <sup>G</sup> | F | 59 | IV   | M1b | Limb (right<br>dorsal calf)                          | Surgery +<br>RT                   | KLH                           | No                | -  | D | 16 |
| MT37              | M | 55 | IV   | M1a | Trunk (right<br>anterior<br>cervical<br>region)      | Surgery                           | KLH                           | No                | -  | D | 6  |
| MT38              | F | 48 | IV   | M1c | Trunk (right<br>dorsal<br>subscapular<br>hemithorax) | Surgery                           | KLH                           | Local<br>erythema | +  | D | 20 |
| MT39 <sup>D</sup> | F | 42 | IV   | M1a | Limb (ventral<br>right foot)                         | Surgery                           | KLH                           | Local<br>erythema | -  | D | 13 |
| MT40              | M | 59 | IV   | M1c | Trunk (left<br>dorsal<br>thoracic with<br>bleeding)  | Surgery +<br>local RT             | KLH                           | No                | -  | D | 7  |
| MT41 <sup>D</sup> | M | 60 | IV   | M1b | Head and<br>neck (right<br>retroauricular)           | Surgery                           | KLH                           | No                | +  | D | 4  |
| MT42              | M | 53 | IV   | M1b | Trunk (right<br>suprapubic<br>inguinal)              | Surgery +<br>RT +<br>Temozolomide | KLH                           | No                | -  | D | 3  |
| MT43 <sup>D</sup> | F | 71 | IV   | M1a | Limb (right<br>heel)                                 | Surgery                           | KLH                           | No                | +  | D | 21 |
| MT44              | F | 25 | IV   | M1a | Trunk (left                                          | Surgery +                         | KLH                           | No                | +  | D | 14 |

|                          |   |    |      |     |                                |                    |                     |                           |   |   |    |
|--------------------------|---|----|------|-----|--------------------------------|--------------------|---------------------|---------------------------|---|---|----|
|                          |   |    |      |     | scapula)                       | local RT           |                     |                           |   |   |    |
| MT46 <sup>G</sup>        | M | 69 | IV   | M1b | Trunk (back)                   | None               | KLH                 | No                        | - | D | 8  |
| MT48 <sup>D</sup>        | F | 44 | IV   | M1c | Limb (left forearm)            | None               | KLH                 | No                        | + | D | 9  |
| MT50 <sup>D</sup>        | F | 52 | IV   | M1c | Limb (left foot sole)          | RT + temozolomide  | KLH                 | No                        | + | D | 3  |
| MT53 <sup>D</sup>        | F | 72 | IV   | M1c | Limb (left ankle)              | None               | KLH                 | No                        | - | D | 5  |
| MT60 <sup>D</sup>        | M | 42 | IV   | M1a | Limb (right leg)               | IL2 + RT           | KLH                 | No                        | + | D | 26 |
| <u>MT61<sup>G</sup></u>  | M | 80 | IV   | M1c | Trunk (urethral meatus)        | CTX                | KLH                 | No                        | - | D | 11 |
| <b>MT64</b>              | F | 45 | IV   | M1c | Head and neck (pharynx)        | CTX                | KLH                 | Local erythema            | - | D | 15 |
| <u>MT65<sup>G</sup></u>  | F | 42 | IV   | M1c | Head and neck (scalp)          | CTX                | KLH                 | No                        | - | D | 6  |
| <u>MT72</u>              | M | 42 | IV   | M1c | Trunk (dorsal)                 | None               | KLH                 | No                        | - | D | 11 |
| <u>MT79<sup>D</sup></u>  | F | 64 | IV   | M1c | Trunk (left flank)             | None               | KLH                 | No                        | - | D | 9  |
| <b>MT83<sup>D</sup></b>  | M | 57 | IIIC | N3  | Limb (right hand)              | None               | KLH                 | No                        | - | D | 17 |
| MT88                     | F | 70 | IV   | M1c | Head and neck (uveal melanoma) | RT + TAM + DTIC    | KLH                 | No                        | + | D | 8  |
| <b>MT96<sup>D</sup></b>  | M | 46 | IIIA | N2a | Trunk (dorsal)                 | None               | Al(OH) <sub>3</sub> | Local erythema            | + | D | 31 |
| <u>MT114<sup>D</sup></u> | M | 47 | IV   | M1c | Trunk (thoracic wall)          | RT + IFN- $\alpha$ | Al(OH) <sub>3</sub> | No                        | - | D | 11 |
| MT118 <sup>D</sup>       | F | 40 | IV   | M1a | Limb (left shoulder)           | ND                 | KLH                 | Dermatitis                | + | D | 28 |
| MT120 <sup>D</sup>       | M | 36 | IV   | M1b | Trunk (dorsal)                 | DTIC               | KLH                 | Local erythema            | + | D | 12 |
| <u>MT122<sup>D</sup></u> | M | 23 | IIIC | ND  | Limb (left leg)                | None               | KLH                 | Local erythema            | + | D | 30 |
| <u>MT123<sup>D</sup></u> | M | 44 | IV   | M1c | Trunk (left flank)             | RT                 | KLH                 | No                        | - | D | 7  |
| <b>MT125<sup>D</sup></b> | F | 54 | IIIC | N3  | Limb (right leg)               | None               | KLH                 | Urticaria reaction to KLH | + | D | 13 |

|                                            |   |    |      |     |                                     |                         |                                  |                   |   |   |     |
|--------------------------------------------|---|----|------|-----|-------------------------------------|-------------------------|----------------------------------|-------------------|---|---|-----|
| MT127 <sup>D</sup>                         | F | 37 | IV   | M1b | Limb (left foot)                    | None                    | KLH                              | Local erythema    | + | D | 12  |
| MT135                                      | M | 72 | IV   | M1a | Head and neck (left retroauricular) | None                    | KLH                              | No                | - | D | 16  |
| MT136 <sup>D</sup>                         | F | 49 | IV   | M1b | Limb (left gluteus)                 | None                    | KLH                              | No                | - | D | 4   |
| Long-term survivors (≥ 36 months) (n = 33) |   |    |      |     |                                     |                         |                                  |                   |   |   |     |
| MT5                                        | F | 24 | IIIC | N3  | Limb (left shoulder)                | Surgery                 | KLH                              | No                | + | R | 247 |
| MT9                                        | M | 62 | IV   | M1a | Head and neck (scalp)               | Surgery + IL-2          | KLH + IL-2                       | No                | + | R | 241 |
| MT10                                       | F | 57 | IIIC | N3  | Unknown                             | IL-2                    | KLH + IL-2 + Al(OH) <sub>3</sub> | No                | + | R | 240 |
| MT13                                       | F | 38 | IIIC | N3  | Head and neck (left cheekbone)      | Local RT + IL-2         | KLH + IL-2                       | No                | + | R | 235 |
| MT15                                       | M | 30 | IV   | M1a | Trunk (abdomen skin)                | Surgery + IL-2          | KLH + IL-2                       | Flu-like symptoms | + | D | 40  |
| MT18                                       | F | 63 | IV   | M1b | Limb (left ankle exterior side)     | Surgery                 | KLH + Al(OH) <sub>3</sub>        | No                | + | D | 36  |
| MT20 <sup>G</sup>                          | F | 51 | IV   | M1c | Head and neck (uveal melanoma)      | Local RT                | KLH                              | No                | + | D | 41  |
| MT21 <sup>D</sup>                          | F | 61 | IV   | M1a | Head and neck (scalp)               | Surgery + local RT      | KLH + Al(OH) <sub>3</sub>        | No                | + | D | 133 |
| MT26 <sup>D</sup>                          | M | 54 | IV   | M1a | Limb (ventral left thigh)           | Surgery + IL-2          | Al(OH) <sub>3</sub> + IL-2       | No                | + | R | 221 |
| MT27                                       | M | 47 | IV   | M1b | Trunk (abdominal wall)              | None                    | KLH                              | Slight migraine   | + | R | 221 |
| MT31 <sup>D</sup>                          | F | 42 | IV   | M1a | Head and neck (right eyelid)        | Surgery + local RT      | KLH + Al(OH) <sub>3</sub>        | Flu-like symptoms | - | D | 62  |
| MT33 <sup>D</sup>                          | M | 44 | IIIC | N3  | Limb (right calf)                   | None                    | KLH                              | No                | + | R | 215 |
| MT35 <sup>D</sup>                          | F | 66 | IV   | M1a | Limb (left dorsal calf)             | IFN- $\alpha$ + surgery | KLH                              | No                | - | D | 119 |
| MT45 <sup>G</sup>                          | M | 19 | IV   | M1a | Unknown                             | Surgery + local RT      | KLH                              | No                | + | D | 62  |

|                    |   |    |      |     |                                |           |                     |                   |   |   |     |
|--------------------|---|----|------|-----|--------------------------------|-----------|---------------------|-------------------|---|---|-----|
| MT49 <sup>D</sup>  | M | 54 | IV   | M1a | Limb (left foot sole)          | None      | KLH                 | No                | + | R | 187 |
| MT58 <sup>D</sup>  | F | 36 | IV   | M1a | Limb (left ankle)              | RT        | KLH                 | No                | + | R | 188 |
| MT62               | F | 40 | IV   | M1a | Trunk (dorsal)                 | CTX       | KLH                 | No                | + | R | 184 |
| MT66 <sup>D</sup>  | M | 54 | IIIC | ND  | Trunk (abdominal wall)         | RT + DTIC | KLH                 | No                | + | D | 40  |
| MT76 <sup>D</sup>  | F | 29 | IV   | M1b | Limb (left foot)               | RT        | KLH                 | No                | + | D | 53  |
| MT80               | M | 74 | IV   | M1c | Head and neck (palate)         | ND        | KLH                 | No                | + | D | 152 |
| MT84 <sup>D</sup>  | M | 47 | IIIC | N3  | Limb (right hand)              | None      | KLH                 | No                | + | D | 66  |
| MT91 <sup>D</sup>  | M | 70 | IV   | M1c | Head and neck (scalp)          | None      | Al(OH) <sub>3</sub> | Local erythema    | + | D | 51  |
| MT94 <sup>D</sup>  | F | 48 | IV   | M1c | Head and neck (uveal melanoma) | RT        | Al(OH) <sub>3</sub> | Local erythema    | + | R | 175 |
| MT101 <sup>D</sup> | M | 41 | IV   | M1a | Limb (right leg)               | None      | KLH                 | Vitiligo          | + | D | 128 |
| MT102 <sup>D</sup> | F | 46 | IV   | M1b | Limb (right thigh)             | DTIC + Ip | KLH                 | No                | + | D | 36  |
| MT103 <sup>D</sup> | F | 47 | IIIB | N2b | Limb (left foot)               | None      | Al(OH) <sub>3</sub> | Flu-like syndrome | + | D | 64  |
| MT105 <sup>D</sup> | F | 56 | IIIA | N2a | Limb (right leg)               | None      | Al(OH) <sub>3</sub> | No                | - | R | 174 |
| MT112 <sup>D</sup> | M | 67 | IIIA | N2a | Trunk (dorsal)                 | None      | Al(OH) <sub>3</sub> | Local erythema    | + | R | 172 |
| MT115 <sup>D</sup> | F | 46 | IB   | NA  | Limb (left shoulder)           | None      | Al(OH) <sub>3</sub> | No                | + | R | 171 |
| MT126 <sup>D</sup> | F | 39 | IB   | NA  | Limb (left axillary)           | None      | KLH                 | No                | + | D | 41  |
| MT128 <sup>D</sup> | F | 34 | IIIB | N2c | Limb (right shoulder)          | RT        | KLH                 | Local erythema    | + | R | 167 |
| MT132 <sup>D</sup> | M | 28 | IV   | M1c | Head and neck (uveal melanoma) | DTIC      | KLH                 | Vitiligo          | - | D | 44  |
| MT133 <sup>D</sup> | F | 30 | IIIB | N2a | Trunk (thorax)                 | None      | KLH                 | No                | - | R | 166 |

CTX: cyclophosphamide; D: deceased; DTH: delayed-type hypersensitivity against TRIMEL; DTIC: dacarbazine; TAM: Tamoxifen; Ip: Ipilimumab F: female; IL: interleukin; IFN: interferon; irAEs: immune-related adverse events; Ip: Ipilimumab; KLH: keyhole limpet hemocyanin; NA: not applicable; ND: not determined; NT: not tested; M: male; Met:

metastasis (N2a: spread to 2 to 3 nearby lymph nodes, micrometastases; N2b: spread to 2 to 3 nearby lymph nodes, macrometastases; N2c: spread to 2 to 3 nearby lymph nodes, in transit; N3: four or more lymph nodes, metastatic or matted, or in-transit met(s)/satellite(s) with metastatic lymph node(s); M1a: in transit skin metastases; M1b: lung metastasis; M1c: metastases in organs other than lungs); OS: overall survival time; P: progressor; R: in remission; RT: radiotherapy; TAM: tamoxifen. (\*) Age at treatment initiation. (#) D and G upper letters indicate D/D or D/G-G/G TLR4 genotypes [13]. In red are depicted patients with data for Th1 and Th17 T cell populations and for serum IL-17 and transforming growth factor (TGF)- $\beta$  [9]. The underline indicates patients with data for CLEC2D, CXCR4, or CD32 expression in peripheral blood leukocytes [10]. Patients MT3, MT8, MT10, and MT34 were revaccinated with a second round of TAPCells one year after the first cycle.

**Supplementary Table S2.** Characteristics of the cohort of advanced melanoma patients treated with TAPCells in a compassionate use setting.

| Code (*)                                              | Sex | Age | Stage | Met | Primary tumor                  | Additional treatment   | DTH | Status | OS (months) |
|-------------------------------------------------------|-----|-----|-------|-----|--------------------------------|------------------------|-----|--------|-------------|
| <b>Short-term survivors (&lt; 36 months) (n = 17)</b> |     |     |       |     |                                |                        |     |        |             |
| MT140                                                 | M   | 45  | IV    | M1b | Limb (right foot)              | None                   | -   | D      | 9           |
| <u>MT141</u>                                          | M   | 55  | IV    | M1c | Limb (knee)                    | RT                     | -   | D      | 21          |
| MT144 <sup>G</sup>                                    | F   | 26  | IIIA  | N2a | Limb (right leg)               | DTIC + IFN             | +   | D      | 14          |
| <u>MT147<sup>G</sup></u>                              | F   | 33  | IV    | M1b | Limb (left leg)                | RT                     | +   | D      | 13          |
| MT148                                                 | M   | 44  | IV    | M1a | Limb (left leg)                | None                   | +   | D      | 22          |
| MT151                                                 | M   | 62  | IV    | M1c | Limb (right leg)               | None                   | -   | D      | 3           |
| MT154                                                 | M   | 39  | IV    | M1c | Unknown                        | None                   | +   | D      | 12          |
| <u>MT158</u>                                          | M   | 55  | IV    | M1a | Limb (right shoulder)          | Surgery + RT           | -   | D      | 10          |
| MT164                                                 | F   | 66  | IV    | M1a | Unknown                        | DITC + CP + VBL        | -   | D      | 15          |
| <u>MT166</u>                                          | F   | 53  | IV    | M1b | Head and neck (facial chin)    | Surgery + RT           | +   | D      | 15          |
| MT167                                                 | F   | 37  | IV    | M1b | Trunk (upper hemithorax)       | Surgery + RT + temodal | +   | D      | 23          |
| MT168                                                 | F   | 51  | IV    | M1c | Limb (left foot sole)          | Surgery + RT           | -   | D      | 4           |
| MT171                                                 | M   | 28  | IV    | M1c | Head and neck (uveal melanoma) | RT + DTIC              | -   | D      | 7           |
| MT175                                                 | M   | 64  | IV    | M1b | Limb (left arm)                | Surgery                | +   | D      | 34          |
| MT183                                                 | M   | 70  | IV    | M1b | Limb (left shoulder)           | Surgery + RT           | -   | D      | 8           |

|                                                                               |   |    |      |     |                            |                    |   |   |     |
|-------------------------------------------------------------------------------|---|----|------|-----|----------------------------|--------------------|---|---|-----|
| MT198                                                                         | F | 68 | IV   | M1b | Limb (right foot)          | None               | - | D | 18  |
| MT199                                                                         | F | 64 | IV   | M1b | Limb (left heel)           | None               | + | D | 1   |
| <b>Long-term survivors (<math>\geq 36</math> months) (<math>n = 7</math>)</b> |   |    |      |     |                            |                    |   |   |     |
| MT146                                                                         | F | 77 | IIIA | N2a | Limb (right leg)           | None               | + | D | 44  |
| MT156                                                                         | F | 61 | IV   | M1c | Trunk (vaginal mucosa)     | Surgery            | + | R | 157 |
| MT159                                                                         | M | 60 | IV   | M1a | Trunk (right groin)        | Surgery            | + | R | 156 |
| MT160                                                                         | M | 51 | IV   | M1a | Head and neck (left cheek) | DITC + CP + VBL    | + | R | 155 |
| MT180                                                                         | M | 32 | IIIC | N2c | Trunk (right dorsal)       | Surgery + local RT | + | R | 149 |
| MT184                                                                         | F | 36 | IV   | M1b | Limb (armpit)              | Surgery            | + | D | 53  |
| MT193                                                                         | F | 53 | IV   | M1b | Unknown                    | None               | + | R | 146 |

CP: cisplatin; D: deceased; DITC: dacarbazine; DTH: delayed-type hypersensitivity against TRIMEL; F: female; IFN: interferon; M: male; Met: metastasis; N: with metastases in lymph nodes; M1a: in transit skin metastases; M1b: lung metastasis; M1c: metastases in organs other than lungs; OS: overall survival time; R: in remission; RT: radiotherapy; VBL: vinblastine. (\*) G upper letter indicates D/G or G/G TLR4 genotypes [13]. Underlined are depicted patients with data for CLEC2D, CXCR4 expression, or CD32 in peripheral blood leukocytes [10]. All these patients were treated with keyhole limpet hemocyanin (KLH) as an adjuvant. There is no data about adverse effects for this cohort.

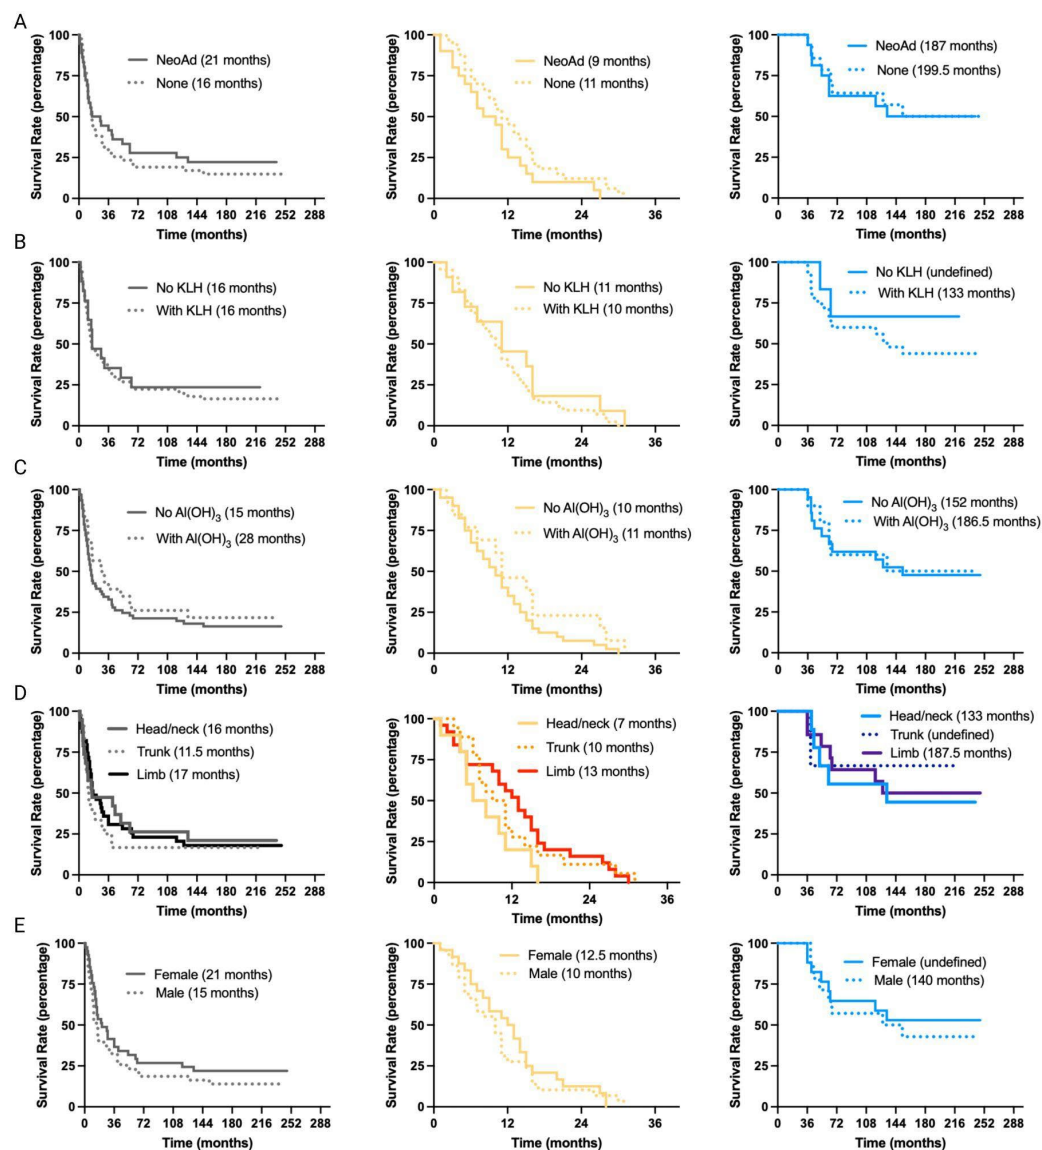

**Supplementary Figure S1.** Overall survival outcomes in short-term and long-term survivors of advanced melanoma patients treated with TAPCells in clinical trial settings. (A-E) Kaplan–Meier post-TAPCells treatment overall survival estimation for advanced melanoma patients (left panels: complete cohort; middle panels: short-term survivors; and right panels: long-term survivors) according to use of neoadjuvant (A; NeoAd), use of KLH (B) use of Al(OH)<sub>3</sub> (C), primary tumor location (D), and sex (E). The median overall survival times in months are shown.



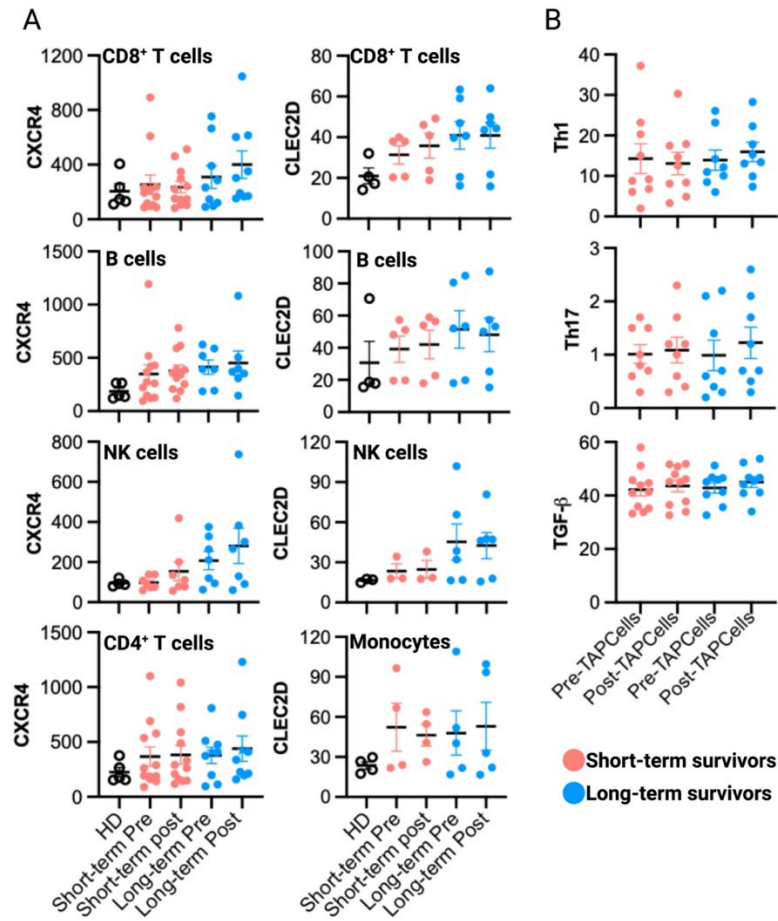

**Supplementary Figure S2.** Immunological aspects associated with long-term overall survival in MM patients treated with TAPCells. (A) Cryopreserved peripheral blood mononuclear cells from healthy donors (HD;  $n = 4-5$ ), short- ( $n = 3-12$ ), and long-term ( $n = 5-9$ ) survivor patients, at the beginning (pre-TAPCells) and at the end (post-TAPCells) of the immunization protocol, were analyzed for CLEC2D and CXCR4 surface expression in monocytes, CD4<sup>+</sup> T cells, CD8<sup>+</sup> T cells, B cells, and natural killer (NK) cells. Each data point represents one patient sample. The graphs show the mean fluorescence intensity of each marker in the corresponding cell type. (B) The percentage of CD4<sup>+</sup>IFN- $\gamma$ <sup>+</sup> (Th1) and CD4<sup>+</sup>IL-17<sup>+</sup> (Th17) T cells and the serum levels of TGF- $\beta$  (ng/mL) for short- ( $n = 10$ ) and long-term ( $n = 4$ ) survivors, at the beginning (pre-TAPCells) and at the end (post-TAPCells) of immunization protocol were analyzed by flow cytometry and ELISA, respectively.
